# Supplementary material
Source: Research Square preprint supplement (doi:10.21203/rs.3.rs-9320727/v1)
Supplement: Supplementary file 1 [file 182a887b3cf1193afb0b9834.docx]

**Edit Supplementary Files**

The preparation and refinement of supplementary files constitute a critical component of the scholarly publication process, particularly in studies that involve complex qualitative synthesis and multi-source analytical frameworks. In the context of this research, supplementary materials were carefully reviewed, edited, and aligned with the core manuscript to ensure methodological transparency, analytical clarity, and overall coherence.

First, all supplementary documents were systematically examined to verify their consistency with the main text. This included cross-checking data representations, thematic categorizations, and referenced materials to ensure that no discrepancies existed between the supplementary content and the arguments presented in the article. Particular attention was given to maintaining alignment between the methodological flowchart, thematic coding structures, and the analytical framework described in the methodology section .

Second, the formatting and structure of supplementary files were refined to meet academic and journal standards. Figures, tables, and diagrams were revised for clarity, appropriate labeling, and logical sequencing. Each supplementary element was provided with a clear title, descriptive caption, and where necessary, explanatory notes to enhance readability and interpretability for reviewers and readers.

Third, language editing was conducted to ensure that all supplementary materials reflect a consistent academic tone and professional standard. Ambiguities, redundancies, and inconsistencies in terminology were eliminated, and key concepts were standardized across all documents. This step was essential to maintain conceptual precision, particularly in relation to core constructs such as cultural hybridity, heritage governance, and gendered labor.

In addition, ethical and citation considerations were addressed by ensuring that all supplementary materials properly acknowledge original sources and remain faithful to the contexts from which data were derived. This reinforces the credibility and integrity of the research while adhering to academic publishing norms.

Finally, the supplementary files were optimized to enhance their functional role within the study. Rather than serving as peripheral attachments, they were positioned as integral extensions of the main analysis—providing visual clarification of methodological processes, detailed breakdowns of thematic findings, and additional empirical support that strengthens the overall argument of the research.

In sum, the editing of supplementary files was undertaken as a deliberate and rigorous process aimed at improving the transparency, accessibility, and scholarly quality of the research output.
